# Supplementary material for: Can Mixed Strains of Lactobacillus and Bifidobacterium Reduce Eczema in Infants under Three Years of Age? A Meta-Analysis
Source: MDPI journal article supplement (doi:10.3390/nu13051461), 2021-04-25
Supplement: s1 [file s1]

## Supplementary Materials

Table S1. Search strategy (example for 3 databases).

| Pubmed               | Search terms for query                                                                                                                                                                                                                                                                                            | Results |
|----------------------|-------------------------------------------------------------------------------------------------------------------------------------------------------------------------------------------------------------------------------------------------------------------------------------------------------------------|---------|
| #1                   | Search ((Probiotics[MeSH Terms]) OR Bifidobacterium[MeSH Terms]) OR Lactobacillus[MeSH Terms]                                                                                                                                                                                                                     | 41150   |
| #2                   | Search ((Eczema[MeSH Terms]) OR Allergic diseases[MeSH Terms]) OR Atopic dermatitis[MeSH Terms]                                                                                                                                                                                                                   | 30229   |
| #3                   | Search (((Probiotics[MeSH Terms]) OR Bifidobacterium[MeSH Terms]) OR Lactobacillus[MeSH Terms])) AND (((Eczema[MeSH Terms]) OR Allergic diseases[MeSH Terms]) OR Atopic dermatitis[MeSH Terms])                                                                                                                   | 373     |
| #4                   | Search (((Infant[MeSH Terms]) OR Children[MeSH Terms]) OR Pregnancy[MeSH Terms]) OR Pregnant woman[MeSH Terms]                                                                                                                                                                                                    | 3138055 |
| #5                   | Search ((((((Probiotics[MeSH Terms]) OR Bifidobacterium[MeSH Terms]) OR Lactobacillus[MeSH Terms])) AND (((Eczema[MeSH Terms]) OR Allergic diseases[MeSH Terms]) OR Atopic dermatitis[MeSH Terms]))) AND (((Infant[MeSH Terms]) OR Children[MeSH Terms]) OR Pregnancy[MeSH Terms]) OR Pregnant woman[MeSH Terms]) | 239     |
| Web of Science       | Search terms for query                                                                                                                                                                                                                                                                                            | Results |
| #1                   | TI = (Probiotics OR Bifidobacterium OR Lactobacillus)<br>Timespan = Before January 2020; Search language=Auto                                                                                                                                                                                                     | 35582   |
| #2                   | TI = (Eczema OR Allergic diseases OR Atopic dermatitis)<br>Timespan = Before January 2020; Search language=Auto                                                                                                                                                                                                   | 36223   |
| #3                   | #1 AND #2<br>Timespan = Before January 2020; Search language=Auto                                                                                                                                                                                                                                                 | 312     |
| #4                   | TI = (Infant OR Children OR Pregnancy OR Pregnant woman)<br>Timespan = Before January 2020; Search language=Auto                                                                                                                                                                                                  | 1380268 |
| #5                   | #3 AND #4<br>Timespan = Before January 2020; Search language=Auto                                                                                                                                                                                                                                                 | 84      |
| The Cochrane library | Search terms for query                                                                                                                                                                                                                                                                                            | Results |
| #1                   | (Probiotics) OR (Bifidobacterium) OR (Lactobacillus)                                                                                                                                                                                                                                                              | 9318    |
| #2                   | (Eczema) OR (Allergic diseases) OR (Atopic dermatitis)                                                                                                                                                                                                                                                            | 11338   |
| #3                   | #1 AND #2                                                                                                                                                                                                                                                                                                         | 491     |
| #4                   | (Infant) OR (Children) OR (Pregnancy) OR (Pregnant woman)                                                                                                                                                                                                                                                         | 188350  |
| #5                   | #3 AND #4                                                                                                                                                                                                                                                                                                         | 376     |
| #6                   | #5 AND Randomized controlled trials                                                                                                                                                                                                                                                                               | 325     |

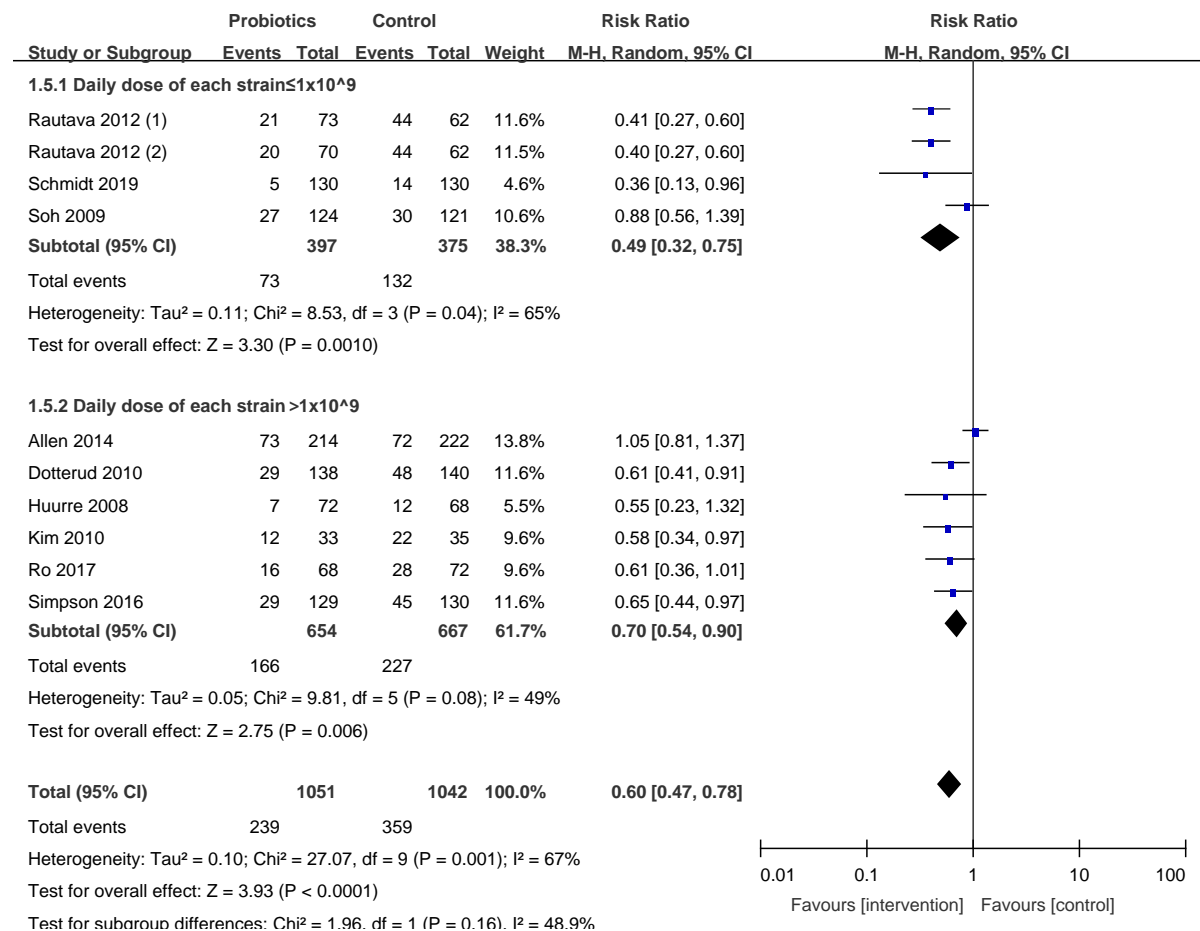

Figure S1. Forest plot of the effect of probiotics dosage on occurrence of Infantile Eczema.

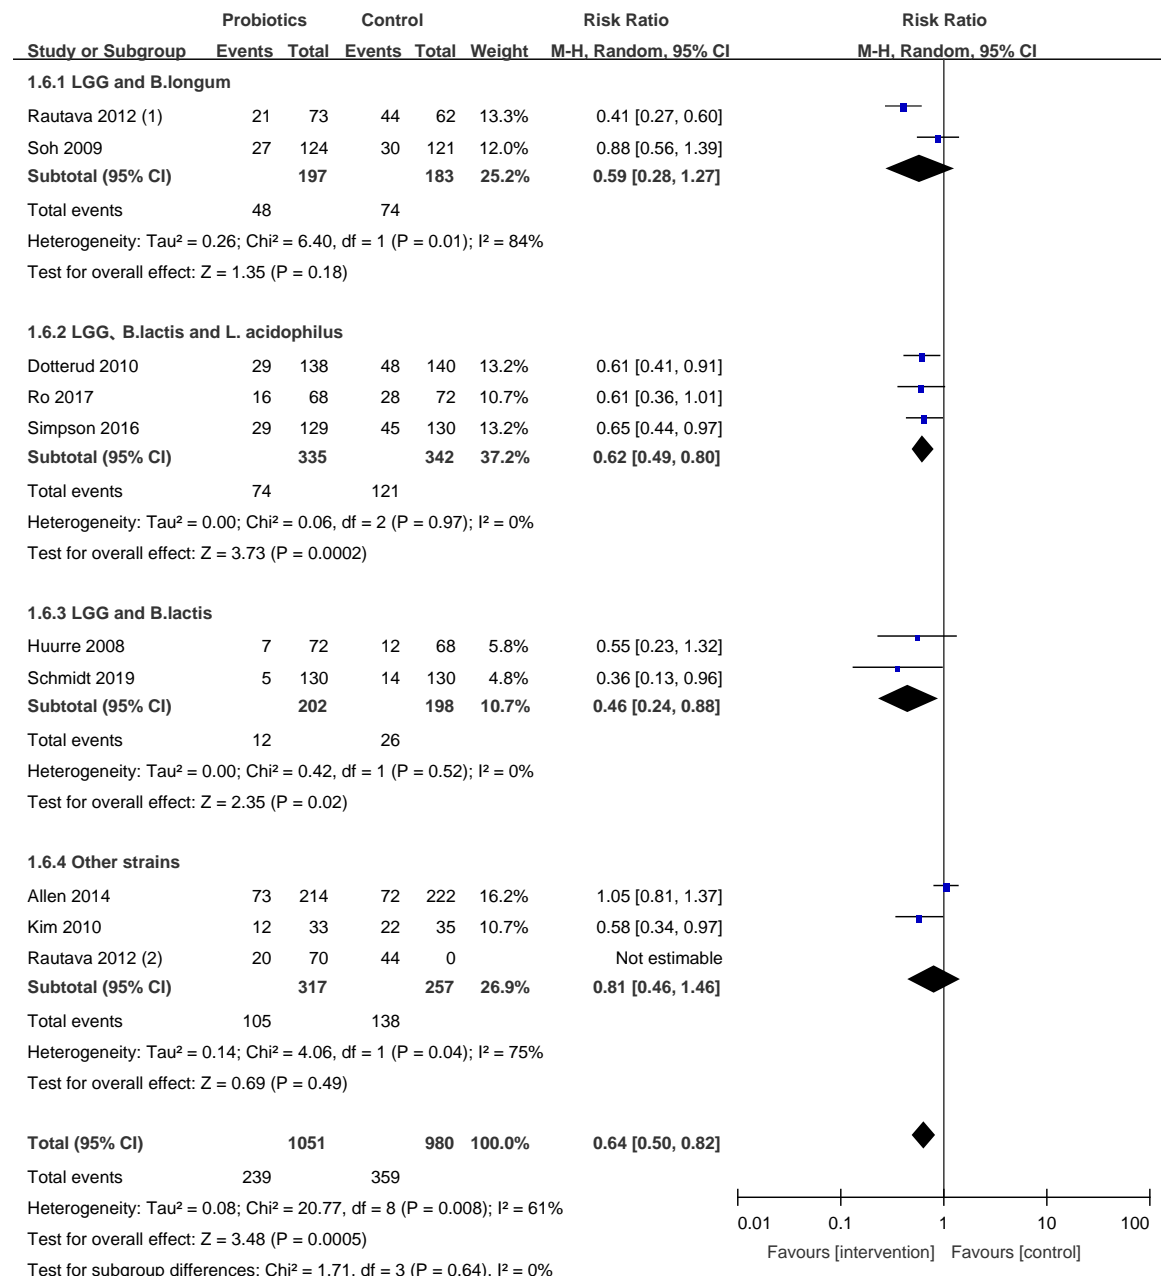

Figure S2. Forest plot of the effect of probiotics strains on occurrence of Infantile Eczema.
